# Supplementary material
Source: HighWire-hosted journal article supplement (http://molpharm.aspetjournals.org/highwire/filestream/76851/field_highwire_adjunct_files/0/LeursSupplementaryMaterial.pdf)

## Molecular determinants of ligand binding to H<sub>4</sub>R species variants

Herman D. Lim, Chris de Graaf, Wen Jiang, Payman Sadek, Patricia M. McGovern, Enade P. Istyastono, Remko A. Bakker, Iwan J.P. de Esch, Robin L. Thurmond, and Rob Leurs

### Supplementary information

#### Contents:

- Page S2: *Supplementary Table I.* Affinity (pK<sub>i</sub>) of H<sub>4</sub>R ligands at the human, pig, and dog H<sub>4</sub>R<sub>s</sub> and selected human H<sub>4</sub>R mutants.
- Page S3: *Supplementary Table II.* Potencies (pEC<sub>50</sub>) of histamine at the H<sub>4</sub> receptor variants
- Page S4: *Supplementary Figure I.* Sequence alignment of ADRB2 to H<sub>4</sub>R orthologs.
- Page S5: *Supplementary Figure II.* Saturation binding of [<sup>3</sup>H]histamine at the H<sub>4</sub>R orthologs
- Page S6: *Supplementary Figure III.* Binding of [<sup>3</sup>H]histamine to the human H<sub>4</sub>R expressed in HEK 293T cells in the absence and presence of 10 μM GTP or GTPγS.
- Page S7: *Supplementary Figure IV.* Functional responses of the H<sub>4</sub>R orthologs to histamine in a Gα<sub>q15</sub>-directed NFAT-luciferase reporter gene assay

**Supplementary Table I.** Affinity ( $pK_i$ ) of  $H_4R$  ligands at the human, pig, and dog  $H_4R$ s and selected human  $H_4R$  mutants. Equilibrium dissociation constants ( $K_D$ ) and  $B_{max}$  values for [ $^3H$ ]histamine (pmol/mg protein) and  $pK_i$  of  $H_4R$  ligands are presented as average  $\pm$  standard error of mean (SEM) of results of at least three independent experiments.

| Receptor                                       | [ $^3H$ ]histamine |               | $pK_i$        |               |               |                   |
|------------------------------------------------|--------------------|---------------|---------------|---------------|---------------|-------------------|
|                                                | $K_D$ (nM)         | $B_{max}$     | Histamine     | Clozapine     | JNJ 7777120   | VUF 8430          |
| Human $H_4R$                                   | 9 $\pm$ 1          | 3.1 $\pm$ 1.1 | 7.9 $\pm$ 0.1 | 6.4 $\pm$ 0.1 | 8.3 $\pm$ 0.1 | 7.5 $\pm$ 0.1     |
| Pig $H_4R$                                     | 11 $\pm$ 3         | 1.0 $\pm$ 0.3 | 7.8 $\pm$ 0.1 | 5.2 $\pm$ 0.1 | 6.3 $\pm$ 0.1 | 6.4 $\pm$ 0.1     |
| Dog $H_4R$                                     | 75 $\pm$ 14        | 3.7 $\pm$ 0.8 | 6.9 $\pm$ 0.1 | 4.5 $\pm$ 0.1 | 7.1 $\pm$ 0.1 | 5.9 $\pm$ 0.1     |
| mkH4R                                          | 15 $\pm$ 2         | 6.9 $\pm$ 0.7 | 7.8 $\pm$ 0.1 | 7.2 $\pm$ 0.1 | 7.4 $\pm$ 0.1 | 7.3 $\pm$ 0.1     |
| PHP chimera                                    | 4 $\pm$ 1          | 0.3 $\pm$ 0.1 | 8.3 $\pm$ 0.1 | 6.8 $\pm$ 0.1 | 7.8 $\pm$ 0.1 | 7.4 $\pm$ 0.1     |
| HPH chimera                                    | 18 $\pm$ 2         | 2.9 $\pm$ 0.2 | 7.8 $\pm$ 0.1 | 4.7 $\pm$ 0.1 | 6.1 $\pm$ 0.1 | 6.3 $\pm$ 0.2     |
| N4.57H                                         | 51 $\pm$ 5         | 2.2 $\pm$ 0.5 | 7.4 $\pm$ 0.1 | 4.7 $\pm$ 0.1 | 7.7 $\pm$ 0.1 | 6.8 $\pm$ 0.1     |
| M4.60V                                         | 14 $\pm$ 3         | 2.4 $\pm$ 0.2 | 7.8 $\pm$ 0.1 | 6.2 $\pm$ 0.1 | 8.2 $\pm$ 0.1 | 7.2 $\pm$ 0.1     |
| S45.42 <sup>156A</sup>                         | 6 $\pm$ 1          | 0.2 $\pm$ 0.1 | 7.8 $\pm$ 0.1 | 6.5 $\pm$ 0.1 | 8.2 $\pm$ 0.1 | 7.5 $\pm$ 0.1     |
| F45.55 <sup>169L</sup>                         | 18 $\pm$ 2         | 2.9 $\pm$ 0.3 | 7.8 $\pm$ 0.1 | 5.7 $\pm$ 0.1 | 8.4 $\pm$ 0.1 | 7.3 $\pm$ 0.1     |
| F45.55 <sup>169L</sup> /S45.56 <sup>170K</sup> | 8 $\pm$ 1          | 3.5 $\pm$ 1.4 | 7.8 $\pm$ 0.1 | 5.6 $\pm$ 0.1 | 8.3 $\pm$ 0.1 | 7.6 $\pm$ 0.1     |
| I5.38V                                         | 10 $\pm$ 2         | 3.5 $\pm$ 0.6 | 7.9 $\pm$ 0.1 | 6.2 $\pm$ 0.1 | 8.3 $\pm$ 0.1 | 7.4 $\pm$ 0.1     |
| L5.39V                                         | 10 $\pm$ 3         | 3.5 $\pm$ 0.6 | 8.0 $\pm$ 0.1 | 7.0 $\pm$ 0.1 | 7.1 $\pm$ 0.1 | n.t. <sup>a</sup> |
| S5.43L                                         | 12 $\pm$ 2         | 3.3 $\pm$ 0.4 | 7.7 $\pm$ 0.1 | 6.6 $\pm$ 0.1 | 7.8 $\pm$ 0.1 | 7.3 $\pm$ 0.1     |
| L5.45F                                         | 17 $\pm$ 2         | 3.0 $\pm$ 0.3 | 7.8 $\pm$ 0.1 | 6.1 $\pm$ 0.1 | 8.3 $\pm$ 0.1 | 7.0 $\pm$ 0.1     |
| N4.57H/S5.43L                                  | 15 $\pm$ 3         | 1.9 $\pm$ 0.3 | 7.8 $\pm$ 0.1 | 4.9 $\pm$ 0.1 | 7.5 $\pm$ 0.1 | 6.5 $\pm$ 0.1     |

<sup>a)</sup> Not tested

**Supplementary Table II.** Potencies ( $pEC_{50}$ ) of histamine at the  $H_4$  receptor variants are presented as average  $\pm$  standard error of mean (SEM) of results of at least three independent experiments.

|            | <b>histamine<br/><math>pEC_{50}</math></b> |
|------------|--------------------------------------------|
| human      | 7.00 $\pm$ 0.08                            |
| monkey     | 6.97 $\pm$ 0.12                            |
| pig        | 6.59 $\pm$ 0.09                            |
| dog        | 6.87 $\pm$ 0.04                            |
| mouse      | 6.23 $\pm$ 0.09                            |
| rat        | 6.04 $\pm$ 0.16                            |
| guinea pig | 6.45 $\pm$ 0.09                            |

**Supplementary Figure I.** Sequence alignment of the human adrenergic beta2 receptor (ADRB2) crystal structure template (boxed in yellow) to human, mouse, rat, maccaca, pig, dog, guineapig histamine H4 receptor. Transmembrane domains (TM1 to TM7) as well as helix 8 (H8) are boxed in cyan. Ecl1-3 and icl1-3 indicate the positions of extracellular and intracellular loops. Residues in bold are conserved Ballesteros-Weinstein reference residues. The residues referred to in the text of the current paper are indicated by their number according to Ballesteros-Weinstein and residue numbers in ecl2 as defined in the Methods section of the current paper. Numbers inserted in the icl3 loop describe the number of residues omitted in the current study (boxed in grey).

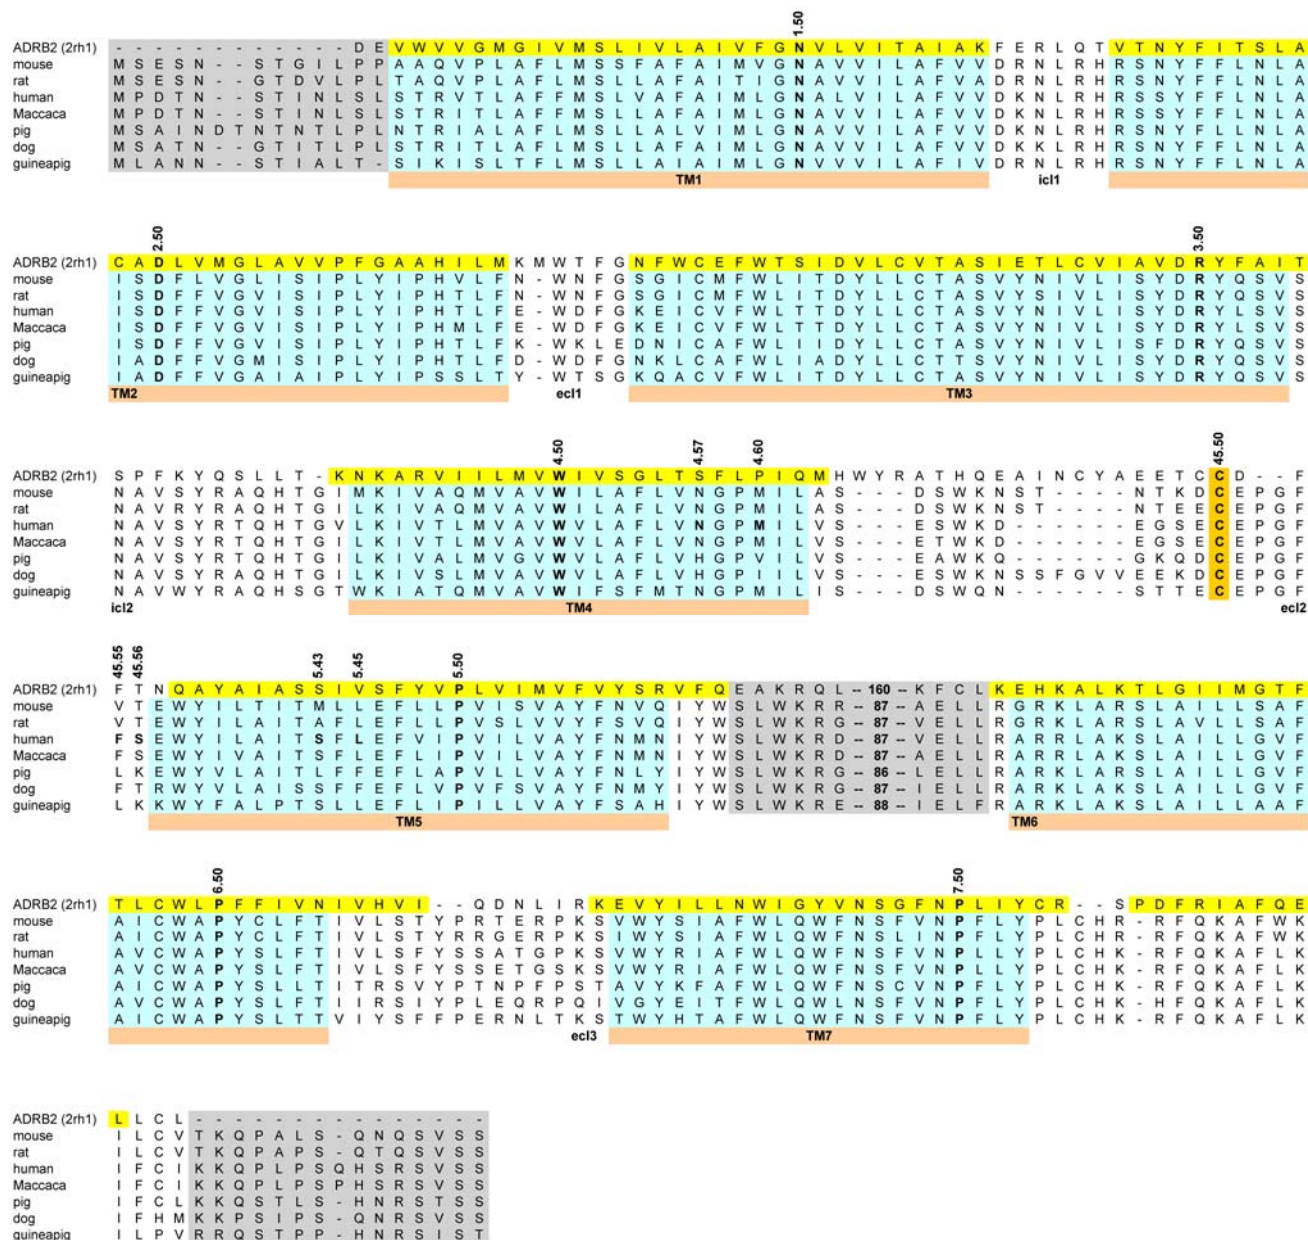

**Supplementary Figure II.:** Saturation binding of [<sup>3</sup>H]histamine at the H<sub>4</sub>R orthologs of human (A), monkey (B), pig (C), dog (D), rat (E), guinea pig (F), and mouse (G). Non-specific binding was determined with 1-30 μM JNJ 7777120. Total binding is depicted in black circles, specific binding in open circles, and non-specific binding in open square.

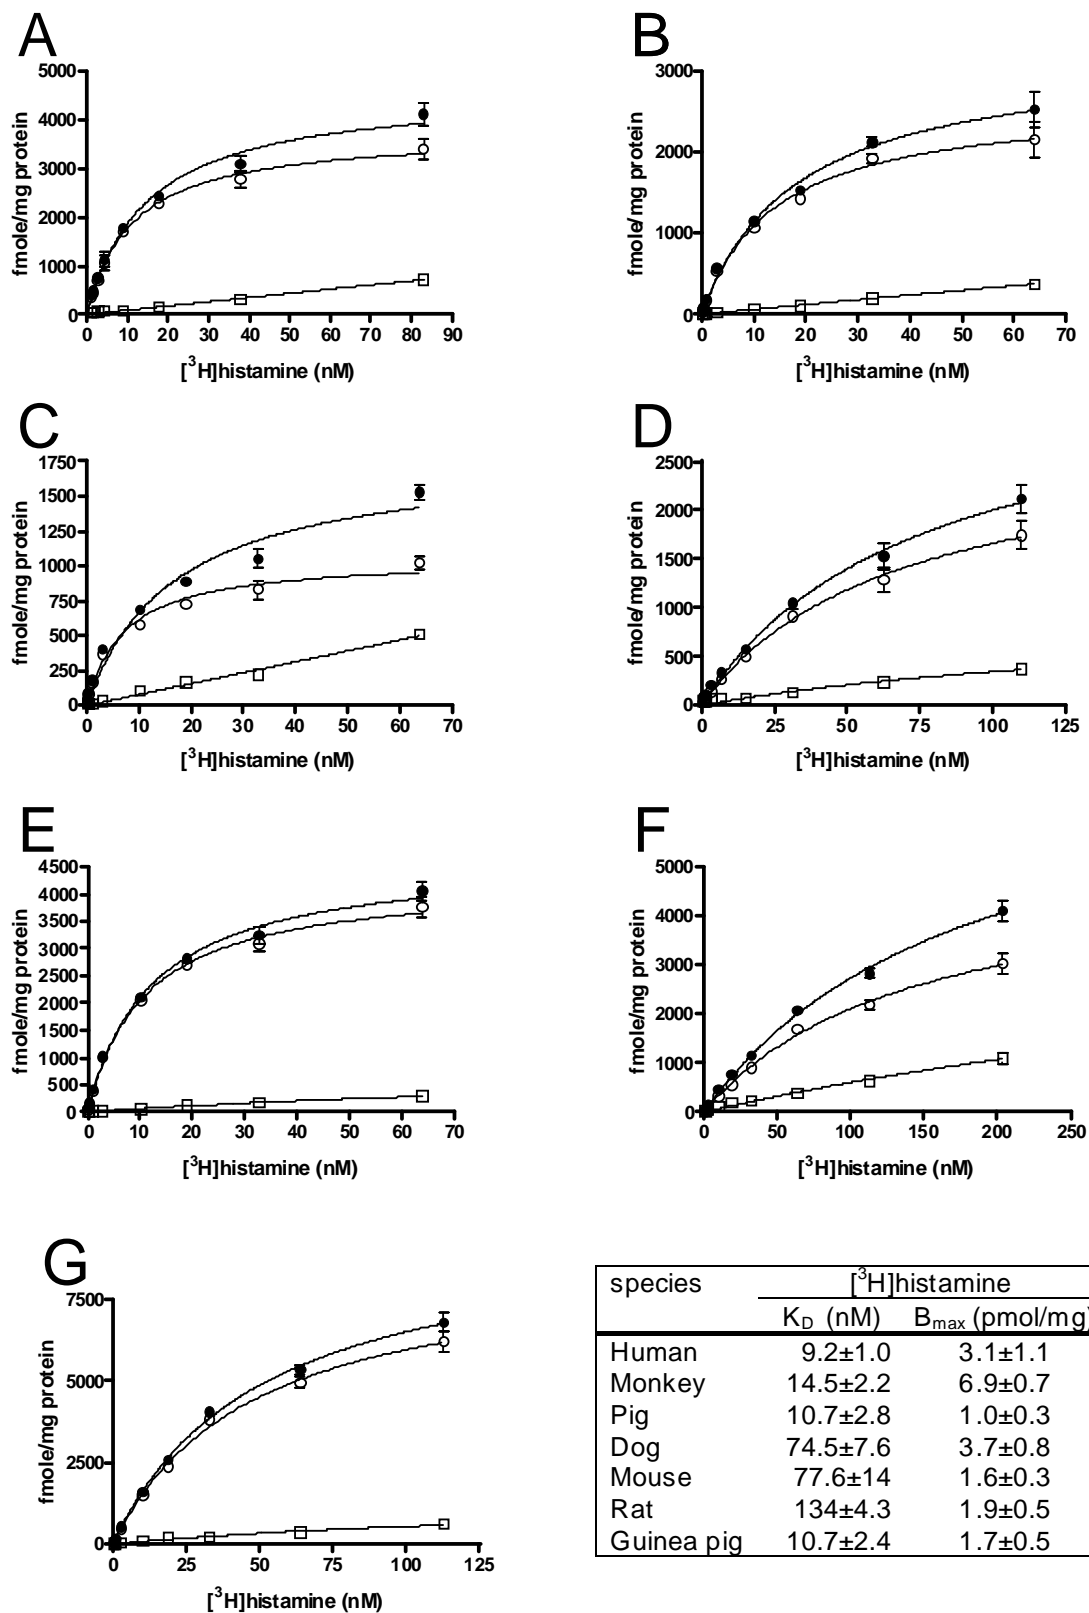

**Supplementary Figure III.** Binding of [<sup>3</sup>H]histamine to the human H<sub>4</sub>R expressed in HEK 293T cells in the absence and presence of 10 μM GTP or GTPγS. The error bars indicate the standard error of mean (SEM) of results of at least three independent experiments.

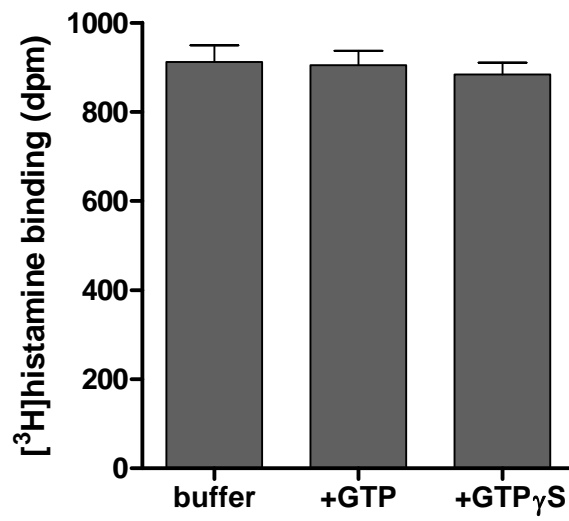

**Supplementary Figure IV.** Functional responses of the  $H_4R$  orthologs to histamine in a  $G\alpha_{q15}$ -directed NFAT-luciferase reporter gene assay according to methodology described previously (Lim et al., 2008).

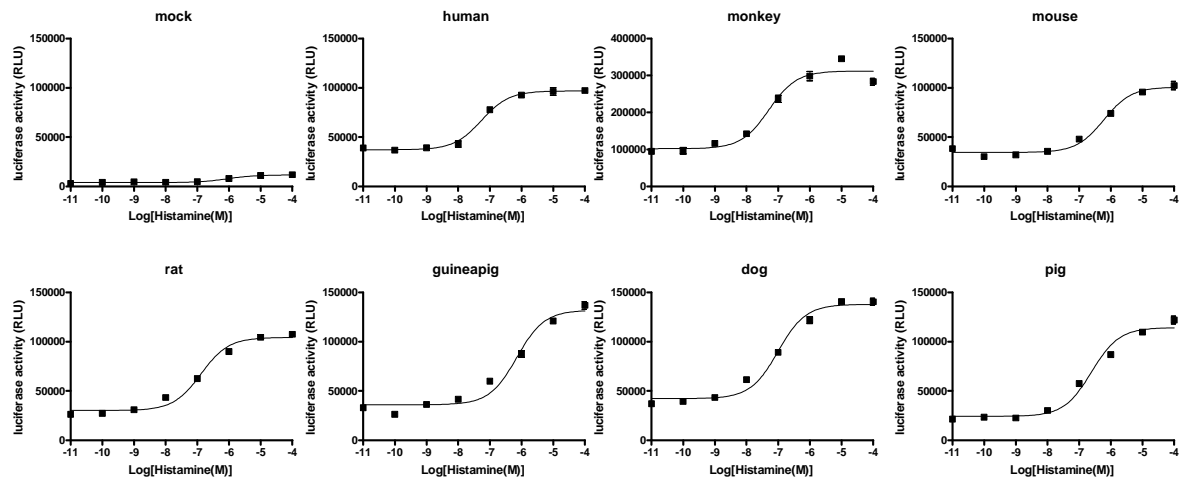

Supplement: LeursSupplementaryMaterial.pdf [file LeursSupplementaryMaterial.pdf]
